# Supplementary material
Source: ML conference proceedings conference paper supplement (https://proceedings.neurips.cc/paper_files/paper/2007/hash/3a0772443a0739141292a5429b952fe6-Abstract.html)
Supplement: Supplementary file [file 3a0772443a0739141292a5429b952fe6-Supplemental.zip]

# Supplement to "Kernel Measures of Conditional Dependence"

This supplementary material provides the technical proofs omitted in the submitted paper. The reference and equation numbers in this material follow the paper.

## A Proof of Theorem 2

*Proof of Theorem 2.* Without loss of generality we can assume  $\phi(0) = 1$ . From the positive definiteness of  $k$ , we have  $|\phi(z)|^2 \leq \phi(0)^2 = 1$ . Recall that the RKHS associated with  $k$  has an explicit expression

$$\mathcal{H} = \left\{ f \in L^2(\mathbb{R}^m) \mid \int \frac{|\tilde{f}(u)|^2}{\tilde{\phi}(u)} du < \infty \right\}, \quad (12)$$

where  $\tilde{\phi}$  and  $\tilde{f}$  are the Fourier transforms of  $\phi$  and  $f$ , respectively.

Let  $P$  be an arbitrary Borel probability on  $\mathbb{R}^m$ , and  $\xi \in \mathbb{R}^m$  be arbitrary. Since the Fourier transform of  $e^{-\sqrt{-1}\xi^T z} \phi(z/\tau)$  is equal to  $\tilde{\phi}(\tau(u + \xi))$ , from Eq. (12) and the assumption of the theorem the function  $e^{-\sqrt{-1}\xi^T z} \phi(z/\tau)$  belongs to  $\mathcal{H}$  for any  $\tau > \tau_0$ . Thus, the bounded convergence theorem guarantees

$$E_P |e^{-\sqrt{-1}\xi^T z} - e^{-\sqrt{-1}\xi^T z} \phi(z/\tau)|^2 \rightarrow 0 \quad (\tau \rightarrow \infty).$$

This implies that we have only to prove that the linear hull of  $\{e^{-\sqrt{-1}\xi^T z} \mid \xi \in \mathbb{R}^m\}$  is dense in  $L^2(P)$ .

Let  $f$  be an arbitrary function in  $L^2(P)$ . We can assume  $f$  is continuously differentiable with a compact support, because those functions are dense in  $L^2(P)$ . Let  $\varepsilon > 0$  be arbitrary,  $M = \sup_{x \in \mathbb{R}} |f(x)|$ , and  $A$  be a positive number such that  $[-A, A]^m$  contains the support of  $f$  and  $P([-A, A]^m) > 1 - \varepsilon/4M^2$ . It is well known [13, Theorem II.8] that the series of functions

$$f_N(z) = \sum_{n_1=-N}^N \cdots \sum_{n_m=-N}^N c_n e^{\frac{\pi\sqrt{-1}}{A} n^T z} \quad (N \in \mathbb{N})$$

( $n = (n_1, \dots, n_m) \in (\mathbb{N} \cup \{0\})^m$ ) with the Fourier coefficients

$$c_n = \frac{1}{(2A)^m} \int_{[-A, A]^m} f(z) e^{-\frac{\pi\sqrt{-1}}{A} n^T z} dz$$

converges uniformly to  $f(z)$  on  $[-A, A]^m$ , as  $N \rightarrow \infty$ . Thus, for sufficiently large  $N$ , we have  $|f(z) - f_N(z)|^2 < \varepsilon/2$  on  $[-A, A]^m$ , and the periodicity of  $f_N(z)$  ensures  $\sup_{z \in \mathbb{R}^m} |f_N(z)|^2 < (M + \sqrt{\varepsilon/2})^2 < 2M^2$ . We obtain  $E_P |f - f_N|^2 < \varepsilon$ , which completes the proof.  $\square$

## B Proof of Theorem 4

We start with a lemma.

**Lemma 6.** Assume that the kernels and the random variables satisfy (A-1), and  $\mathcal{H}_Z + \mathbb{R}$  is dense in  $L^2(P_Z)$ . Then,

$$\langle g, \Sigma_{YY}^{1/2} V_{YZ} V_{ZX} \Sigma_{XX}^{1/2} f \rangle_{\mathcal{H}_Y} = E \left[ \left( E[f(X)|Z] - E[f(X)] \right) \left( E[g(X)|Z] - E[g(X)] \right) \right].$$

*Proof.* Since it is known [8] that  $\Sigma_{ZZ}$  is Hilbert-Schmidt under the assumption (A-1), there exists a CONS  $\{\phi_i\}_{i=1}^\infty$  of  $\mathcal{H}_Z$  such that  $\Sigma_{ZZ} \phi_i = \lambda_i \phi_i$  with an eigenvalue  $\lambda_i \geq 0$ . Let  $I_+ = \{i \in \mathbb{N} \mid \lambda_i > 0\}$ , and define

$$\tilde{\phi}_i = \frac{1}{\sqrt{\lambda_i}} (\phi_i - E[\phi(Z)])$$

for  $i \in I_+$ . Because  $\mathcal{R}(V_{ZY})$  and  $\mathcal{R}(V_{ZX})$  are orthogonal to  $\mathcal{N}(\Sigma_{ZZ})$ , we have

$$\begin{aligned}
& \langle g, \Sigma_{YY}^{1/2} V_{YZ} V_{ZX} \Sigma_{XX}^{1/2} f \rangle_{\mathcal{H}_Y} \\
&= \sum_{i=1}^{\infty} \langle \phi_i, V_{ZY} \Sigma_{YY}^{1/2} g \rangle_{\mathcal{H}_Y} \langle \phi_i, V_{ZX} \Sigma_{XX}^{1/2} f \rangle_{\mathcal{H}_X} \\
&= \sum_{i \in I_+} \langle \phi_i, V_{ZY} \Sigma_{YY}^{1/2} g \rangle_{\mathcal{H}_Y} \langle \phi_i, V_{ZX} \Sigma_{XX}^{1/2} f \rangle_{\mathcal{H}_X} \\
&= \sum_{i \in I_+} \left\langle \frac{1}{\sqrt{\lambda_i}} \phi_i, \Sigma_{ZY} g \right\rangle_{\mathcal{H}_Y} \left\langle \frac{1}{\sqrt{\lambda_i}} \phi_i, \Sigma_{ZX} f \right\rangle_{\mathcal{H}_X} \\
&= \sum_{i \in I_+} (\tilde{\phi}_i, E[g(Y)|Z] - E[g(Y)])_{L_2(P_Z)} (\tilde{\phi}_i, E[f(X)|Z] - E[f(X)])_{L_2(P_Z)}.
\end{aligned}$$

Obviously,  $\{\tilde{\phi}_i\}_{i \in I_+}$  is an orthonormal system in  $L_2(P_Z)$ . Furthermore, from the assumption that  $\mathcal{H}_Z + \mathbb{R}$  is dense in  $L^2(P_Z)$ , the system  $\{\tilde{\phi}_i\}_{i \in I_+} \cup \{1\}$  is a CONS in  $L^2(P_Z)$ . This implies

$$\begin{aligned}
& \langle g, \Sigma_{YY}^{1/2} V_{YZ} V_{ZX} \Sigma_{XX}^{1/2} f \rangle_{\mathcal{H}_Y} \\
&= (E[g(Y)|Z] - E[g(Y)], E[f(X)|Z] - E[f(X)])_{L_2(P_Z)} \\
&\quad - (1, E[g(Y)|Z] - E[g(Y)])_{L_2(P_Z)} (1, E[f(X)|Z] - E[f(X)])_{L_2(P_Z)} \\
&= E_Z \left[ (E[g(Y)|Z] - E[g(Y)]) (E[f(X)|Z] - E[f(X)]) \right],
\end{aligned}$$

which proves the lemma.  $\square$

Using the above lemma, Theorem 4 is proved as follows.

*Proof of Theorem 4.* Let  $\{\phi_i\}_{i=1}^{\infty}$  and  $\{\psi_j\}_{j=1}^{\infty}$  be complete orthonormal systems of  $\mathcal{H}_X$  and  $\mathcal{H}_Y$ , respectively, consisting of the eigenfunctions of  $\Sigma_{XX}$  and  $\Sigma_{YY}$  with  $\Sigma_{XX} \phi_i = \lambda_i \phi_i$  ( $\lambda_i \geq 0$ ) and  $\Sigma_{YY} \psi_j = \nu_j \psi_j$  ( $\nu_j \geq 0$ ). Then, we have the expansion

$$\begin{aligned}
\|V_{YX}|Z\|_{HS}^2 &= \sum_{i,j=1}^{\infty} \langle \psi_j, V_{YX} \phi_i \rangle_{\mathcal{H}_Y}^2 - 2 \sum_{i,j=1}^{\infty} \langle \psi_j, V_{YX} \phi_i \rangle_{\mathcal{H}_Y} \langle \psi_j, V_{YZ} V_{ZX} \phi_i \rangle_{\mathcal{H}_Y} \\
&\quad + \sum_{i,j=1}^{\infty} \langle \psi_j, V_{YZ} V_{ZX} \phi_i \rangle_{\mathcal{H}_Y}^2.
\end{aligned} \tag{13}$$

Let  $I_+^X = \{i \in \mathbb{N} \mid \lambda_i > 0\}$  and  $I_+^Y = \{j \in \mathbb{N} \mid \nu_j > 0\}$ . In a similar manner to the proof of Lemma 6, with the notations  $\tilde{\phi}_i = (\phi_i - E[\phi_i(X)])/\sqrt{\lambda_i}$  and  $\tilde{\psi}_j = (\psi_j - E[\psi_j(Y)])/\sqrt{\nu_j}$  for  $i \in I_+^X$  and  $j \in I_+^Y$ , the first term of Eq. (13) is rewritten as

$$\begin{aligned}
\sum_{i \in I_+^X, j \in I_+^Y} \langle \tilde{\psi}_j, \Sigma_{YX} \tilde{\phi}_i \rangle_{\mathcal{H}_Y}^2 &= \sum_{i \in I_+^X, j \in I_+^Y} E_{YX} [\tilde{\psi}_j(Y) \tilde{\phi}_i(X)]^2 \\
&= \sum_{i \in I_+^X, j \in I_+^Y} \left( \int \int_{\mathcal{X} \times \mathcal{Y}} p_{XY}(x, y) \tilde{\phi}_i(x) \tilde{\psi}_j(y) d\mu_X d\mu_Y \right)^2.
\end{aligned}$$

Let  $\tilde{\phi}_0 = 1$  and  $\tilde{\psi}_0 = 1$ . From the assumption that  $(\mathcal{H}_X \otimes \mathcal{H}_Y) + \mathbb{R}$  is dense in  $L^2(P_X \otimes P_Y)$ , the class  $\{\tilde{\phi}_i \tilde{\psi}_j\}_{i \in I_+^X \cup \{0\}, j \in I_+^Y \cup \{0\}}$  is a CONS of  $L_2(P_X \otimes P_Y)$ . Thus, the last line of the above equations is further rewritten as

$$\begin{aligned}
& \left\| \frac{p_{XY}(x, y)}{p_X(x) p_Y(y)} \right\|_{L_2(P_X \otimes P_Y)}^2 - \sum_{i \in I_+^X} E[\tilde{\phi}_i(X)] - \sum_{j \in I_+^Y} E[\tilde{\psi}_j(Y)] - 1 \\
&= \int \int_{\mathcal{X} \times \mathcal{Y}} \frac{p_{XY}^2(x, y)}{p_X(x) p_Y(y)} d\mu_X d\mu_Y - 1.
\end{aligned}$$

For the second term of Eq. (13), Lemma 6 implies

$$\begin{aligned}
& \sum_{i,j=1}^{\infty} \langle \psi_j, V_{YX} \phi_i \rangle_{\mathcal{H}_Y} \langle \psi_j, V_{YZ} V_{ZX} \phi_i \rangle_{\mathcal{H}_Y} \\
&= \sum_{i \in I_+^X, j \in I_+^Y} \langle \tilde{\psi}_j, \Sigma_{YX} \tilde{\phi}_i \rangle_{\mathcal{H}_Y} \langle \tilde{\psi}_j, \Sigma_{YY}^{1/2} V_{YZ} V_{ZX} \Sigma_{XX}^{1/2} \tilde{\phi}_i \rangle_{\mathcal{H}_Y} \\
&= \sum_{i \in I_+^X, j \in I_+^Y} E[\tilde{\psi}_j(Y) \tilde{\phi}_i(X)] E[E[\tilde{\psi}_j(Y)|Z] E[\tilde{\phi}_i(X)|Z]] \\
&= \sum_{i \in I_+^X, j \in I_+^Y} \int \int_{\mathcal{X} \times \mathcal{Y}} \tilde{\psi}_j(y) \tilde{\phi}_i(x) p_{XY}(x, y) d\mu_X d\mu_Y \int \int_{\mathcal{X} \times \mathcal{Y}} \tilde{\psi}_j(y) \tilde{\phi}_i(x) p_{X \perp Y|Z}(x, y) d\mu_X d\mu_Y \\
&= \sum_{i \in I_+^X, j \in I_+^Y} \left( \tilde{\psi}_j \tilde{\phi}_i, \frac{p_{XY}}{p_X p_Y} \right)_{L_2(P_X \otimes P_Y)} \left( \tilde{\phi}_i \tilde{\psi}_j, \frac{p_{X \perp Y|Z}}{p_X p_Y} \right)_{L_2(P_X \otimes P_Y)}.
\end{aligned}$$

By a similar argument to the case of the first term, the second term of Eq. (13) equals

$$-2 \left( \frac{p_{XY}}{p_X p_Y}, \frac{p_{X \perp Y|Z}}{p_X p_Y} \right)_{L_2(P_X \otimes P_Y)} + 2,$$

and the third term of Eq. (13) equals

$$\left\| \frac{p_{X \perp Y|Z}}{p_X p_Y} \right\|_{L_2(P_X \otimes P_Y)}^2 - 1.$$

This completes the proof.  $\square$

## C Proof of Theorem 5

*Proof.* From the expressions in Eq. (3) and Eq. (6), it is sufficient to prove  $\|\hat{V}_{YX}^{(n)} - V_{YX}\|_{HS} \rightarrow 0$  in probability. The proof is analogous to those of Lemma 6 and 7 in [4], though considering the Hilbert-Schmidt norm is more involved.

From the trivial decomposition

$$\begin{aligned}
\|\hat{V}_{YX}^{(n)} - V_{YX}\|_{HS} &\leq \|\hat{V}_{YX}^{(n)} - (\Sigma_{YY} + \varepsilon_n I)^{-1/2} \Sigma_{YX} (\Sigma_{XX} + \varepsilon_n I)^{-1/2}\|_{HS} \\
&\quad + \|(\Sigma_{YY} + \varepsilon_n I)^{-1/2} \Sigma_{YX} (\Sigma_{XX} + \varepsilon_n I)^{-1/2} - V_{YX}\|_{HS},
\end{aligned}$$

it suffices to show

$$\|\hat{V}_{YX}^{(n)} - (\Sigma_{YY} + \varepsilon_n I)^{-1/2} \Sigma_{YX} (\Sigma_{XX} + \varepsilon_n I)^{-1/2}\|_{HS} = O_p(\varepsilon_n^{-3/2} n^{-1/2}), \quad (14)$$

and

$$\|(\Sigma_{YY} + \varepsilon_n I)^{-1/2} \Sigma_{YX} (\Sigma_{XX} + \varepsilon_n I)^{-1/2} - V_{YX}\|_{HS} = o(1). \quad (15)$$

The operator on the left hand side of Eq. (14) is decomposed as

$$\begin{aligned}
& \{(\hat{\Sigma}_{YY}^{(n)} + \varepsilon_n I)^{-1/2} - (\Sigma_{YY} + \varepsilon_n I)^{-1/2}\} \hat{\Sigma}_{YX}^{(n)} (\hat{\Sigma}_{XX}^{(n)} + \varepsilon_n I)^{-1/2} \\
& + (\Sigma_{YY} + \varepsilon_n I)^{-1/2} \{\hat{\Sigma}_{YX}^{(n)} - \Sigma_{YX}\} (\hat{\Sigma}_{XX}^{(n)} + \varepsilon_n I)^{-1/2} \\
& + (\Sigma_{YY} + \varepsilon_n I)^{-1/2} \Sigma_{YX} \{(\hat{\Sigma}_{XX}^{(n)} + \varepsilon_n I)^{-1/2} - (\Sigma_{XX} + \varepsilon_n I)^{-1/2}\}.
\end{aligned} \quad (16)$$

From the equality

$$A^{-1/2} - B^{-1/2} = A^{-1/2} (B^{3/2} - A^{3/2}) B^{-3/2} + (A - B) B^{-3/2},$$

the first term of Eq. (16) is equal to

$$\begin{aligned}
& \{(\hat{\Sigma}_{YY}^{(n)} + \varepsilon_n I)^{-1/2} \{(\Sigma_{YY} + \varepsilon_n I)^{3/2} - (\hat{\Sigma}_{YY}^{(n)} + \varepsilon_n I)^{3/2}\} + (\hat{\Sigma}_{YY}^{(n)} - \Sigma_{YY})\} \\
& \quad \times (\hat{\Sigma}_{YY}^{(n)} + \varepsilon_n I)^{-3/2} \hat{\Sigma}_{YX}^{(n)} (\hat{\Sigma}_{XX}^{(n)} + \varepsilon_n I)^{-1/2}.
\end{aligned}$$

Using  $\|(\widehat{\Sigma}_{YY}^{(n)} + \varepsilon_n I)^{-1/2}\| \leq \frac{1}{\sqrt{\varepsilon_n}}$ ,  $\|(\widehat{\Sigma}_{YY}^{(n)} + \varepsilon_n I)^{-1/2} \widehat{\Sigma}_{YX}^{(n)} (\widehat{\Sigma}_{XX}^{(n)} + \varepsilon_n I)^{-1/2}\| \leq 1$ , and Lemma 7 below, the HS norm of the above operator is bounded from above by

$$\frac{1}{\varepsilon_n} \left\{ \frac{3}{\sqrt{\varepsilon_n}} \max\{\|\Sigma_{YY} + \varepsilon_n I\|^{1/2}, \|\widehat{\Sigma}_{YY}^{(n)} + \varepsilon_n I\|^{1/2}\} + 1 \right\} \|\widehat{\Sigma}_{YY}^{(n)} - \Sigma_{YY}\|_{HS}.$$

A similar bound also applies to the HS norm of the third term in Eq. (16). An upper bound on the HS norm of the second term is simply  $\frac{1}{\varepsilon_n} \|\Sigma_{YX} - \widehat{\Sigma}_{YX}^{(n)}\|_{HS}$ . Thus, Eq. (14) is obtained by noticing  $\|\widehat{\Sigma}_{XX}^{(n)}\| = \|\Sigma_{XX}\| + o_p(1)$ ,  $\|\widehat{\Sigma}_{YY}^{(n)}\| = \|\Sigma_{YY}\| + o_p(1)$ , and the fact  $\|\widehat{\Sigma}_{YX}^{(n)} - \Sigma_{YX}\|_{HS} = O_p(1/\sqrt{n})$  [4, Lemma 5].

To prove Eq. (15), take CONS's  $\{\phi_i\}_{i=1}^\infty$  and  $\{\psi_j\}_{j=1}^\infty$  for  $\mathcal{H}_X$  and  $\mathcal{H}_Y$ , respectively, in the same manner as in the proof of Theorem 4. We have

$$\begin{aligned} & \|(\Sigma_{YY} + \varepsilon_n I)^{-1/2} \Sigma_{YX} (\Sigma_{XX} + \varepsilon_n I)^{-1/2} - V_{YX}\|_{HS}^2 \\ &= \sum_{i,j=1}^\infty \langle \psi_j, \{(\Sigma_{YY} + \varepsilon_n I)^{-1/2} \Sigma_{YX} (\Sigma_{XX} + \varepsilon_n I)^{-1/2} - V_{YX}\} \phi_i \rangle_{\mathcal{H}_Y}^2 \\ &= \sum_{i,j=1}^\infty \left\{ \sqrt{\frac{\lambda_i}{\lambda_i + \varepsilon_n}} \sqrt{\frac{\nu_i}{\nu_i + \varepsilon_n}} - 1 \right\}^2 \langle \psi_j, V_{YX} \phi_i \rangle_{\mathcal{H}_X}^2. \end{aligned}$$

Because each summand in the last line is upper bounded by  $\langle \psi_j, V_{YX} \phi_i \rangle_{\mathcal{H}_Y}^2$  and the series  $\sum_{i,j=1}^\infty \langle \psi_j, V_{YX} \phi_i \rangle_{\mathcal{H}_Y}^2$  is finite from the assumption that  $V_{YX}$  is Hilbert-Schmidt, the dominated convergence theorem guarantees the interchangeability of the series and the limit  $\varepsilon_n \rightarrow 0$ ; thus, we have

$$\begin{aligned} & \lim_{\varepsilon \rightarrow 0} \|(\Sigma_{YY} + \varepsilon_n I)^{-1/2} \Sigma_{YX} (\Sigma_{XX} + \varepsilon_n I)^{-1/2} - V_{YX}\|_{HS}^2 \\ &= \sum_{i,j=1}^\infty \lim_{\varepsilon_n \rightarrow 0} \left\{ \sqrt{\frac{\lambda_i}{\lambda_i + \varepsilon_n}} \sqrt{\frac{\nu_i}{\nu_i + \varepsilon_n}} - 1 \right\}^2 \langle \psi_j, V_{YX} \phi_i \rangle_{\mathcal{H}_X}^2 = 0. \end{aligned}$$

This shows Eq. (15) and completes the proof.  $\square$

**Lemma 7.** Suppose  $A$  and  $B$  are positive, self-adjoint, Hilbert-Schmidt operators on a Hilbert space. Then,

$$\|A^{3/2} - B^{3/2}\|_{HS} \leq 3(\max\{\|A\|, \|B\|\})^{1/2} \|A - B\|_{HS}.$$

*Proof.* Without loss of generality we can assume  $\max\{\|A\|, \|B\|\} = 1$ . Then, we have  $0 \leq A, B \leq I$ . Define functions  $f$  and  $g$  on  $\{z \in \mathbb{C} \mid |z| \leq 1\}$  by  $f(z) = (1 - z)^{3/2}$  and  $g(z) = (1 - z)^{1/2}$ . Let

$$f(z) = \sum_{n=1}^\infty b_n z^n \quad \text{and} \quad g(z) = \sum_{n=0}^\infty c_n z^n$$

be the power series expansions. They converge absolutely for  $|z| \leq 1$ . Using the facts  $b_0 = 1$ ,  $b_1 = -\frac{3}{2}$ , and  $b_n > 0$  ( $n \geq 2$ ), the inequality

$$\begin{aligned} \sum_{n=0}^N |b_n| &= 1 + \frac{3}{2} + \sum_{n=2}^N b_n = 1 + \frac{3}{2} + \lim_{x \uparrow 1} \sum_{n=2}^N b_n x^n \\ &\leq 1 + \frac{3}{2} + \lim_{x \uparrow 1} \left\{ f(x) - 1 + \frac{3}{2} \right\} = 3 \end{aligned}$$

is obtained for all  $N$ . The bound  $\sum_{n=0}^\infty |c_n| \leq 2$  can be proved similarly. Obviously,  $|nb_n| = |c_n|$  for  $n \geq 2$  and  $|b_1| = \frac{3}{2}|c_0|$ .

Define a series of operators  $\{D_N\}_{N=1}^\infty$  by

$$D_N = \sum_{n=0}^N b_n ((I - A)^n - (I - B)^n).$$

Expansion of the right hand side shows that  $D_N$  is Hilbert-Schmidt. The Hilbert-Schmidt norm of  $D_N$  satisfies

$$\|D_N\|_{HS} \leq \sum_{n=0}^N |b_n| \|(I-A)^n - (I-B)^n\|_{HS}.$$

We can prove by induction that  $\|(I-A)^n - (I-B)^n\|_{HS} \leq n\|A-B\|_{HS}$  holds for all  $n$ ; in fact, this follows from the inequality

$$\begin{aligned} & \|(I-A)^n - (I-B)^n\|_{HS} \\ &= \|((I-A) - (I-B))(I-A)^{n-1} + (I-B)((I-A)^{n-1} - (I-B)^{n-1})\|_{HS} \\ &\leq \|(I-A)^{n-1}\| \|A-B\|_{HS} + \|I-B\| \|(I-A)^{n-1} - (I-B)^{n-1}\|_{HS}. \end{aligned}$$

Thus, we obtain

$$\|D_N\|_{HS} \leq \sum_{n=0}^N n|b_n| \|A-B\|_{HS} \leq \frac{3}{2} \sum_{n=0}^N |c_n| \|A-B\|_{HS},$$

which implies  $D_N$  is a Cauchy sequence in the Hilbert space of the Hilbert-Schmidt operators. Thus, there is a Hilbert-Schmidt operator  $D_*$  such that  $\|D_N - D_*\|_{HS} \rightarrow 0$ . On the other hand, from the fact  $O \leq I-A, I-B \leq I$ , in the expression

$$D_N = \sum_{n=0}^N b_n (I-A)^n - \sum_{n=0}^N b_n (I-B)^n,$$

the two terms in the right hand side converge in operator norm to  $A^{3/2}$  and  $B^{3/2}$ , respectively; hence  $D_N \rightarrow A^{3/2} - B^{3/2}$  in operator norm. This necessarily means  $D_* = A^{3/2} - B^{3/2}$ , and we have

$$\|A^{3/2} - B^{3/2}\|_{HS} = \lim_{N \rightarrow \infty} \|D_N\|_{HS} \leq \frac{3}{2} \lim_{N \rightarrow \infty} \sum_{n=0}^N |c_n| \|A-B\|_{HS} = 3\|A-B\|_{HS}.$$

□
